# Supplementary material for: Prevalence and risk factors for atrial fibrillation in dogs with myxomatous mitral valve disease
Source: PubMed Central journal article supplement (PMC7694843; doi:10.1111/jvim.15927), 2020-10-08
Supplement: JVIM-34-2223-s001.pdf [file JVIM-34-2223-s001.pdf]

**Appendix 1:** Type of treatment and drugs administered to 2,194 dogs with myxomatous mitral valve disease with and without atrial fibrillation (AF)

| Therapy / Drugs          | AF Group, n = 59 dogs        | No AF Group, n = 2135 dogs    | Total, n= 2194 dogs          |
|--------------------------|------------------------------|-------------------------------|------------------------------|
|                          | Number (%)                   | Number (%)                    | Number (%)                   |
| <b>Cardiac treatment</b> | <b>48 (15.4)<sup>a</sup></b> | <b>263 (84.6)<sup>a</sup></b> | <b>311 (100)<sup>b</sup></b> |
| ACE-Is                   | 45 (17.4)                    | 214 (82.6)                    | 259 (83.3)                   |
| Pimobendan               | 29 (18.1)                    | 131 (81.9)                    | 160 (51.4)                   |
| Furosemide-Torasemide    | 41 (21.5)                    | 150 (78.5)                    | 191 (61.4)                   |
| Digoxin                  | 17 (85)                      | 3 (15)                        | 20 (6.4)                     |
| Spironolactone           | 16 (23.2)                    | 53 (76.8)                     | 69 (22.2)                    |
| Sildenafil               | 6 (24)                       | 19 (76)                       | 25 (8.0)                     |
| Hydroclortiazide         | 5 (71.4)                     | 2 (28.6)                      | 7 (2.3)                      |
| Amlodipine               | 4 (28.6)                     | 10 (71.4)                     | 14 (4.5)                     |
| Diltiazem                | 3 (100)                      | 0 (0)                         | 3 (1.0)                      |
| Sotalol                  | 1 (100)                      | 0 (0)                         | 1 (0.3)                      |
| Mexiletine               | 1 (100)                      | 0 (0)                         | 1 (0.3)                      |
| Amiodarone               | 0 (0)                        | 1 (100)                       | 1 (0.3)                      |
| <b>Mixed treatment</b>   | <b>0 (0)</b>                 | <b>47 (100)</b>               | <b>47 (100)</b>              |
| ACE-Is                   | 0 (0)                        | 35 (100)                      | 35 (74.5)                    |
| Pimobendan               | 0 (0)                        | 11 (100)                      | 11 (23.4)                    |
| Furosemide-Torasemide    | 0 (0)                        | 10 (100)                      | 10 (21.3)                    |
| Spironolactone           | 0 (0)                        | 16 (100)                      | 16 (34)                      |
| Amlodipine               | 0 (0)                        | 5 (100)                       | 5 (10.6)                     |
| Sildenafil               | 0 (0)                        | 3 (100)                       | 3 (6.4)                      |
| Antibiotics              | 0 (0)                        | 10 (100)                      | 10 (21.3)                    |
| Steroids                 | 0 (0)                        | 5 (100)                       | 5 (10.6)                     |
| NSAIDs                   | 0 (0)                        | 4 (100)                       | 4 (8.5)                      |
| Anticonvulsants          | 0 (0)                        | 3 (100)                       | 3 (6.4)                      |
| Antacids-Antiemetics     | 0 (0)                        | 2 (100)                       | 2 (4.3)                      |
| Antihistamines           | 0 (0)                        | 2 (100)                       | 2 (4.3)                      |
| Trilostane               | 0 (0)                        | 10 (100)                      | 10 (21.3)                    |
| Levothyroxine            | 0 (0)                        | 2 (100)                       | 2 (4.3)                      |
| Insulin                  | 0 (0)                        | 2 (100)                       | 2 (4.3)                      |
| Chemotherapy             | 0 (0)                        | 1 (100)                       | 1 (2.1)                      |
| Chondroitin sulphate     | 0 (0)                        | 10 (100)                      | 10 (21.3)                    |
| Opioids                  | 0 (0)                        | 5 (100)                       | 5 (10.6)                     |
| Hepatoprotective drugs   | 0 (0)                        | 4 (100)                       | 4 (8.5)                      |
| <b>Other treatments</b>  | <b>2 (1.0)</b>               | <b>206 (99.0)</b>             | <b>208 (100)</b>             |
| Antibiotics              | 2 (3.0)                      | 64 (97.0)                     | 66 (31.7)                    |
| Steroids                 | 0 (0)                        | 26 (100)                      | 26 (12.5)                    |
| NSAIDs                   | 0 (0)                        | 33 (100)                      | 33 (15.9)                    |
| Anticonvulsants          | 0 (0)                        | 47 (100)                      | 47 (22.6)                    |
| Antacids-Antiemetics     | 0 (0)                        | 49 (100)                      | 49 (23.6)                    |
| Antihistamines           | 0 (0)                        | 6 (100)                       | 6 (2.9)                      |
| Trilostane               | 0 (0)                        | 21 (100)                      | 21 (10.1)                    |
| Levothyroxine            | 0 (0)                        | 4 (100)                       | 4 (1.9)                      |

|                            |                |                    |                   |
|----------------------------|----------------|--------------------|-------------------|
| Insulin                    | 0 (0)          | 13 (100)           | 13 (6.3)          |
| Chemotherapy               | 0 (0)          | 6 (100)            | 6 (2.9)           |
| Chondroitin sulphate       | 0 (0)          | 19 (100)           | 19 (9.1)          |
| Opioids                    | 0 (0)          | 15 (100)           | 15 (7.2)          |
| Hepatoprotective drugs     | 0 (0)          | 10 (100)           | 10 (4.8)          |
| Vitamins-Other supplements | 0 (0)          | 6 (100)            | 6 (2.9)           |
| Lipid lowering             | 0 (0)          | 3 (100)            | 3 (1.4)           |
| Xanthine                   | 0 (0)          | 3 (100)            | 3 (1.4)           |
| Acetyl cysteine            | 0 (0)          | 2 (100)            | 2 (1.0)           |
| Salbutamol                 | 0 (0)          | 1 (100)            | 1 (0.5)           |
| Ketoconazole               | 0 (0)          | 1 (100)            | 1 (0.5)           |
| Antiandrogen               | 0 (0)          | 1 (100)            | 1 (0.5)           |
| Tranexamic acid            | 0 (0)          | 1 (100)            | 1 (0.5)           |
| Clopidogrel                | 0 (0)          | 2 (100)            | 2 (1.0)           |
| <b>No therapy</b>          | <b>9 (0.6)</b> | <b>1619 (99.4)</b> | <b>1628 (100)</b> |

<sup>a</sup>Within treatment type (drug) percentages (row); <sup>b</sup>within treatment group percentages (column)

ACE-Is: angiotensin-converting enzyme inhibitors; NSAIDs: non-steroidal anti-inflammatory drugs.
